# Supplementary material
Source: PubMed Central journal article supplement (PMC3713212)
Supplement: supp_en.2013-1222_EN-12-1222suppfig1tabs4.pdf [file supp_en.2013-1222_EN-12-1222suppfig1tabs4.pdf]

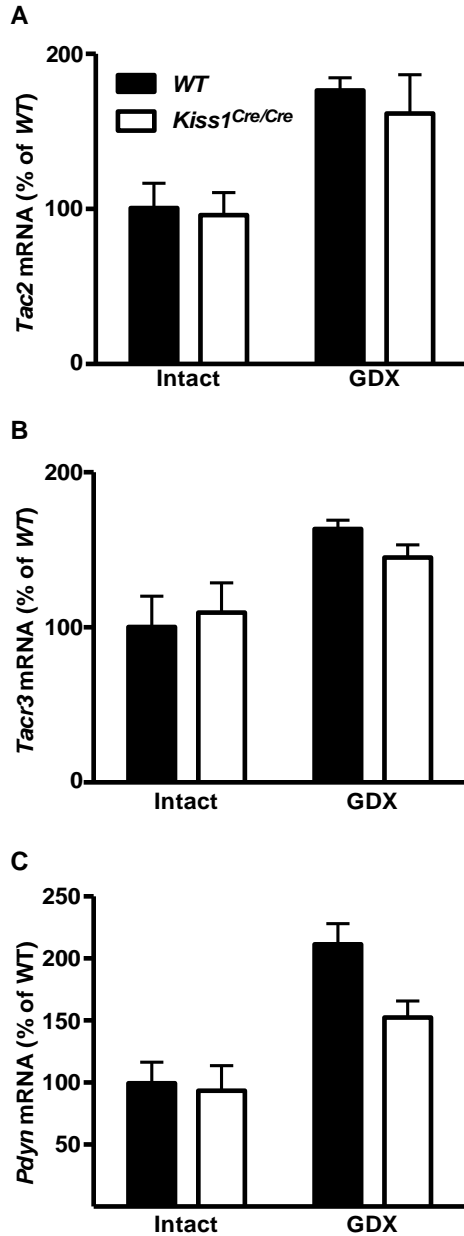

**Supplemental Figure 1.** Co-neurotransmitter and receptor expression in the MBH of *Kiss1<sup>Cre/Cre</sup>* male mice. Two-way ANOVA revealed a significant effect of GDX on the expression of **A.** *Tac2* (which encodes NKB,  $p < 0.005$ ), **B.** *Tacr3* (which encodes the NKB receptor,  $p < 0.01$ ), and **C.** *Pdyn* (which encodes dynorphin,  $p < 0.001$ ). There was no effect of genotype and no interaction between treatment and genotype for any of the 3 genes.

| <b>Gene – Primer</b> | <b>Oligo Sequence</b>          |
|----------------------|--------------------------------|
| <i>Tac2</i> -FOR     | TTC CAC AGA AAC GTG ACA TGC    |
| <i>Tac2</i> -REV     | GGG GGT GTT CTC TTC AAC CAC    |
| <i>Tacr3</i> -FOR    | GCC ACA GCC ACT AAG ATT GTC    |
| <i>Tacr3</i> -REV    | CGG CCT GGC ATG ACT TTT ATT TT |
| <i>PDyn</i> -FOR     | GAG GTT GCT TTG GAA GAA GGC    |
| <i>PDyn</i> -REV     | TTT CCT CTG GGA CGC TGG TAA    |
| <i>Actb</i> -FOR     | AGTGTGACGTTGACATCCGTA          |
| <i>Actb</i> -REV     | GCCAGAGCAGTAATCTCCTTCT         |

**Supplemental Table 1.** Primers for SYBR qRT-PCR.

| <b>Cycle</b> | <b>Time</b>                                                     | <b>Temperature</b> |
|--------------|-----------------------------------------------------------------|--------------------|
| 1            | 30 min                                                          | 50 C               |
| 2            | 10 min                                                          | 95 C               |
| 3            | 15 - 30 sec                                                     | 95C                |
| 4            | 1 min                                                           | 60C                |
| 5            | Repeat Steps 3-4 for 45 cycles                                  |                    |
| 6            | 1 min                                                           | 95C                |
| 7            | 30 sec                                                          | 55C                |
| 8            | 55C to 95C temperature ramp with fluorescence read every second | 55C-95C            |
| 9            | 30 sec                                                          | 95C                |

**Supplemental Table 2.** qRT-PCR steps. The melting curve in steps 6-9 was only used for SYBR reactions.

| Assay            | Treatment & Sex              | Reportable Range | Intra-assay % CV |
|------------------|------------------------------|------------------|------------------|
| LH multiplex     | GDX + E females              | 0.24-30.0 ng/ml  | 9%               |
| LH multiplex     | GDX males                    | 0.24-30.0 ng/ml  | 7%               |
| FSH multiplex    | GDX males                    | 2.4-300.0 ng/ml  | 4%               |
| Testosterone RIA | Intact males                 | 5.9-1100 ng/dl   | 4%               |
| LH IRMA          | GDX females                  | 0.04-37.4 ng/ml  | 16%              |
| LH IRMA          | Intact females<br>(senktide) | 0.04-37.4 ng/ml  | 7%               |
| Male FSH IRMA    | Intact males                 | 3.1-75.0 ng/ml   | 6%               |

**Supplemental Table 3.** Reportable ranges and intra-assay coefficients of variation for hormone assays. % CV = coefficient of variation.

|                            | WT               | <i>KissI</i> <sup>Cre/+</sup> | <i>KissI</i> <sup>Cre/Cre</sup> |
|----------------------------|------------------|-------------------------------|---------------------------------|
| <b><i>KissI</i> Intact</b> | 11.93 ± 2.48     | 4.71 ± 0.33                   | 0.75 ± 0.16                     |
| <b><i>KissI</i> GDX</b>    | 100.00 ± 9.56*** | 43.11 ± 10.47***              | 5.65 ± 1.01***                  |
| <b>LH Intact</b>           | 0.26 ± 0.17      | 0.84 ± 0.73                   | 0.39 ± 0.10                     |
| <b>LH GDX</b>              | 3.72 ± 1.28**    | 2.91 ± 0.75*                  | 1.95 ± 0.39*                    |

**Supplemental Table 4.** *KissI* transcript and LH increase in response to castration. *KissI* mRNA levels are expressed as a percent of castrated WT animals. qRT-PCR with Taqman primers/probe data are normalized to *Actb*. p<0.0001 for effect of treatment, genotype and interaction between treatment & genotype for *KissI* expression. p<0.0005 for effect of treatment on LH using two-way ANOVA. \*p<0.05, \*\*p<0.01 and \*\*\*p<0.001 for comparing intact to GDX animals (with 1-tailed Mann Whitney U-test for LH and t-test for *KissI*).
